# Supplementary material for: Crystal structures of fukutin-related protein (FKRP), a ribitol-phosphate transferase related to muscular dystrophy
Source: PubMed Central journal article supplement (PMC6965139; doi:10.1038/s41467-019-14220-z), 2020-01-16
Supplement: 41467_2019_14220_MOESM1_ESM.pdf [file 41467_2019_14220_MOESM1_ESM.pdf]

## Supplementary Information

Crystal structures of fukutin-related protein (FKRP), a ribitol-phosphate transferase related to muscular dystrophy

Naoyuki Kuwabara, Rieko Imae *et al.*

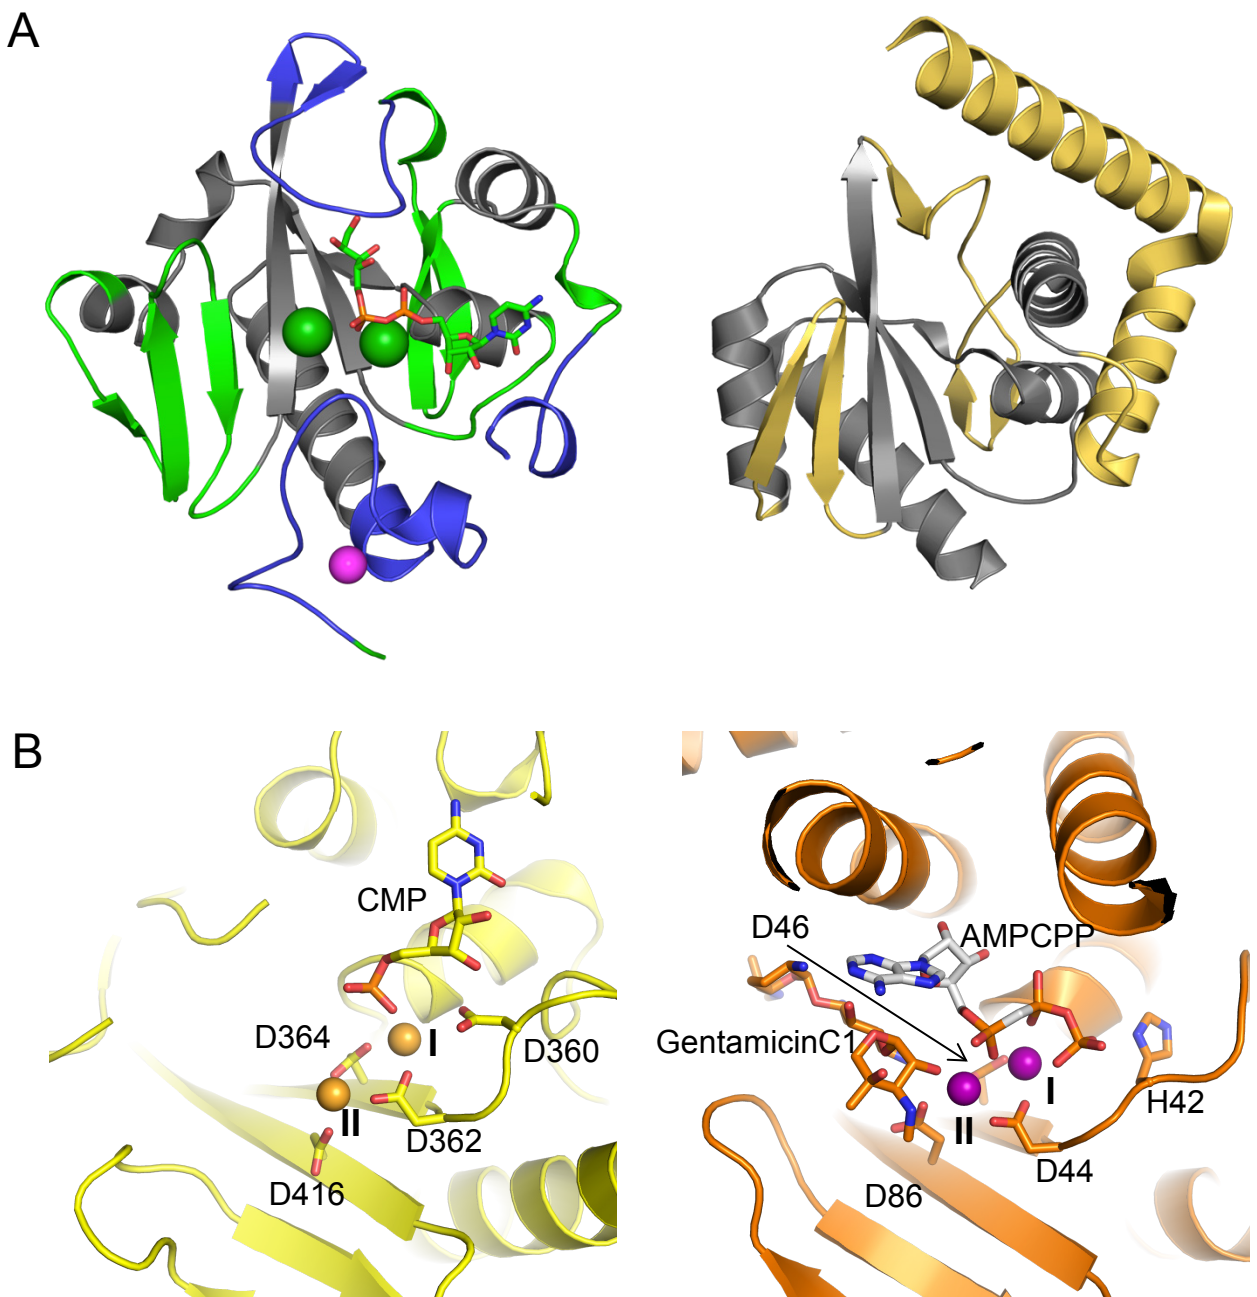

**Supplementary Figure 1.**

Structural comparison of FKRP and NTase. A) Catalytic domains of FKRP (left panel) and ANT(2'')-Ia (right panel, PDB ID; 5KQJ) as a representative NTase are shown. The bound  $\text{Ba}^{2+}$ ,  $\text{Zn}^{2+}$  and CDP-Rbo are shown as green spheres, a purple sphere and a stick model, respectively. The FKRP-specific structures (the zinc finger loop, a loop ordered by acceptor binding, and the C-terminal loop region) are colored blue. In both panels, the NTase core domains are colored grey. B) Structural comparison around the active sites. The left panel shows the structure of active site of sFKRP in  $\text{Mg}^{2+}$  (orange balls) and CMP-bound state. D360, D362, D364, D416 and CMP are shown as stick models. The right panel shows the structure of the active site of ANT(2'')-Ia in gentamicin C1,  $\text{Mn}^{2+}$  (purple balls) and AMPCPP (adenosine-5'-[( $\alpha,\beta$ )-methyleno]-triphosphate) bound state (PDB ID; 5CFT). Carbon atoms are shown in white in AMPCPP. H42, D44, D46, D86 and kanamycin are shown as stick models. The residues excluding H42 (which corresponds to D360 in FKRP, and does not interact with  $\text{Mn}^{2+}$ ) are conserved.

## Stem domain

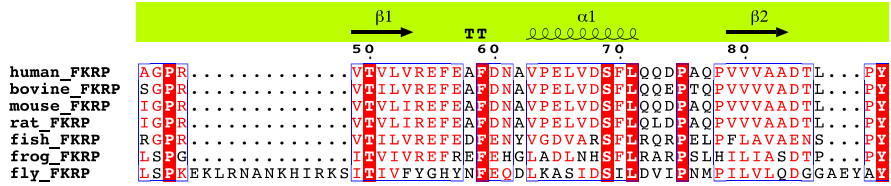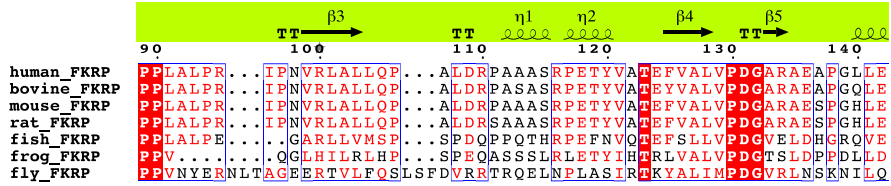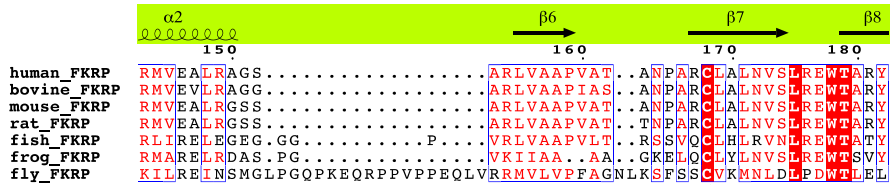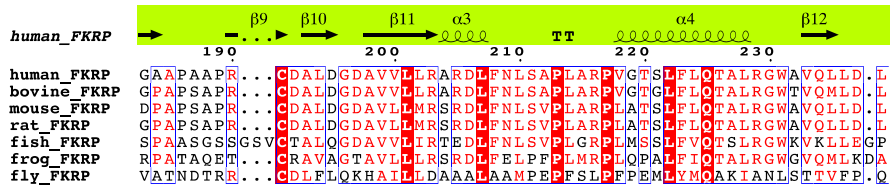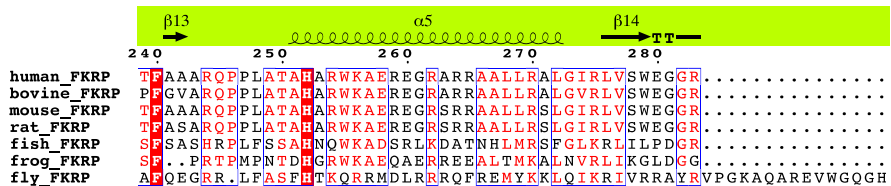

## Catalytic domain

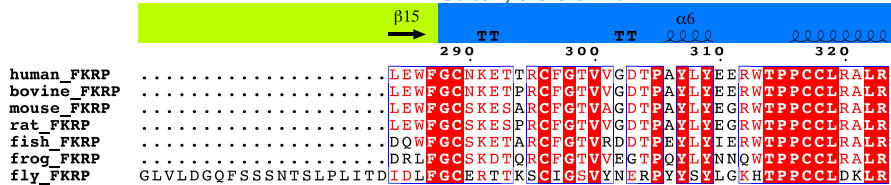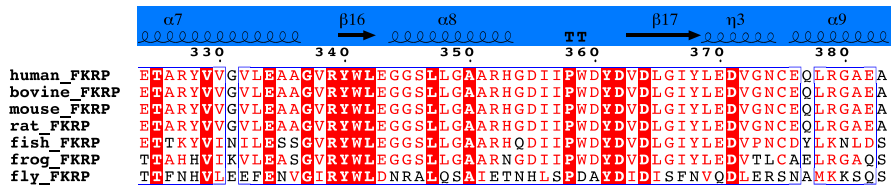

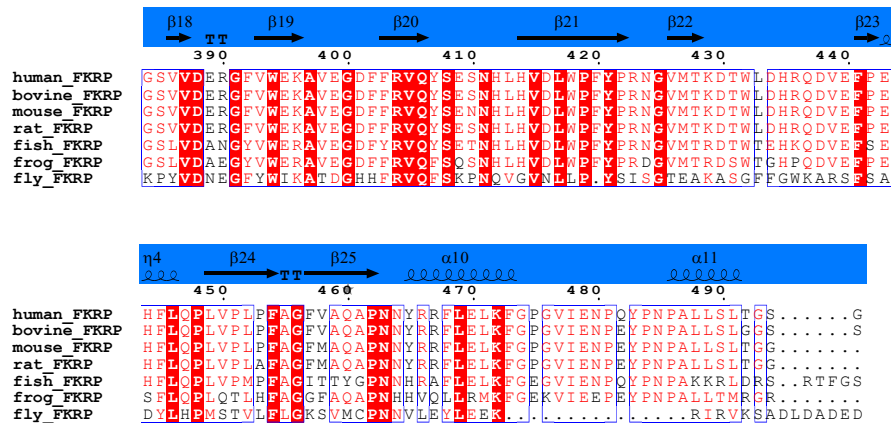

### Supplementary Figure 2.

Structure-based sequence alignment of FKRP homologues, calculated using the program MAFFT [1]. White letters on red boxes represent identical amino-acid residues; red letters boxed by blue represent homologous residues. Arrows ( $\beta$ -strand), TTs (turn), coil symbols ( $\alpha$ -helix) above the sequences, and green 1 characters (S-S bond) below the sequence are determined and drawn using ENDscript server [2] and the program ESPRIPT 3.0 (<http://endscript.ibcp.fr>). The aligned proteins sequences are from human (Q9H955), bovine (F1MN71), mouse (Q8CG64), rat (Q4KLJ4), fish (Q0PIP5), frog (A0A1L8F835), and fly (Q9W2P2). UniprotKB/Swiss-Prot entries are indicated in parentheses.

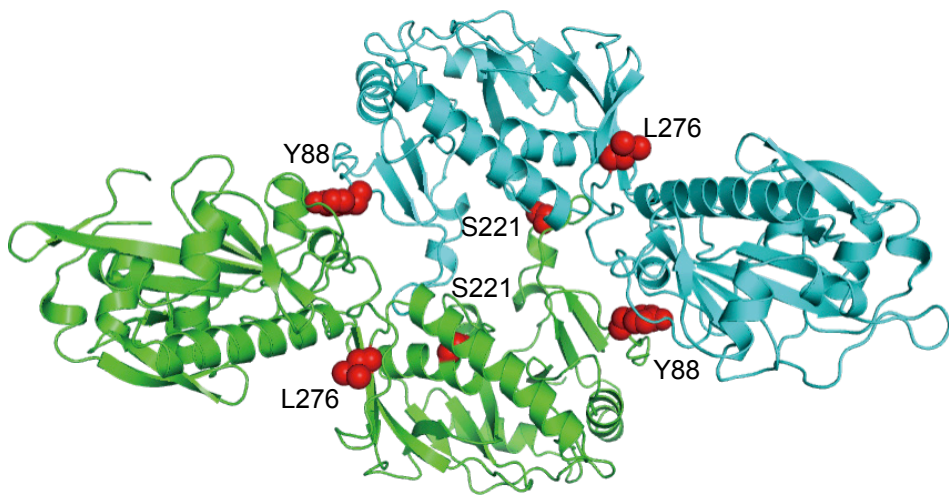

**Supplementary Figure 3.**

Mutation sites in the protomeric dimer. The dimer structure of sFKRP is shown in cartoon model. Three disease-related mutation sites analyzed in this study are shown in red spheres.

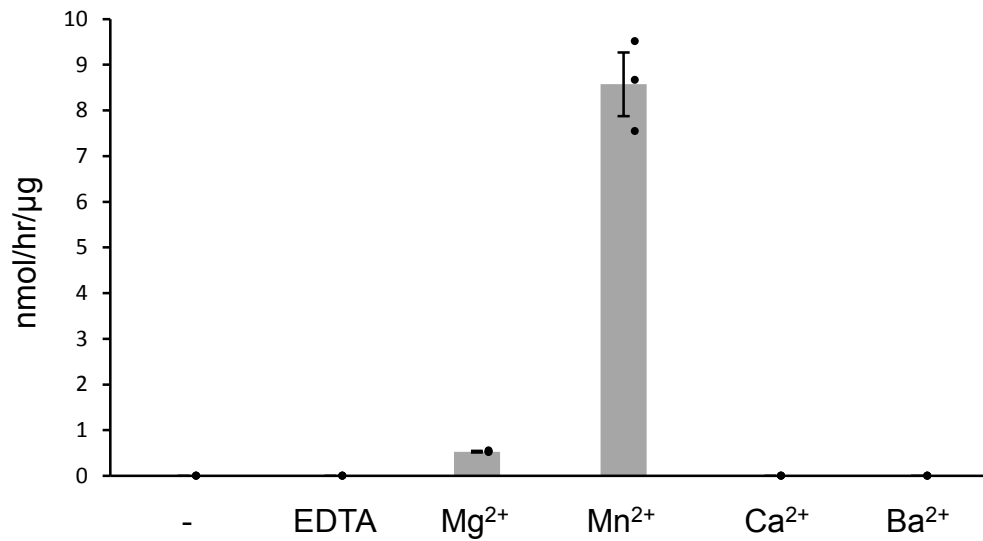

#### Supplementary Figure 4.

Divalent cation requirements for the enzymatic activity of sFKRP with CDP-Rbo and the RboP-(phospho-)core M3 peptide. A reaction buffer containing no divalent cations or containing 10 mM EDTA, MgCl<sub>2</sub>, MnCl<sub>2</sub>, CaCl<sub>2</sub> or BaCl<sub>2</sub> was used respectively. Average values ± SE of three independent experiments are shown. Each dot represents one data point. Source data are provided as a Source Data file.

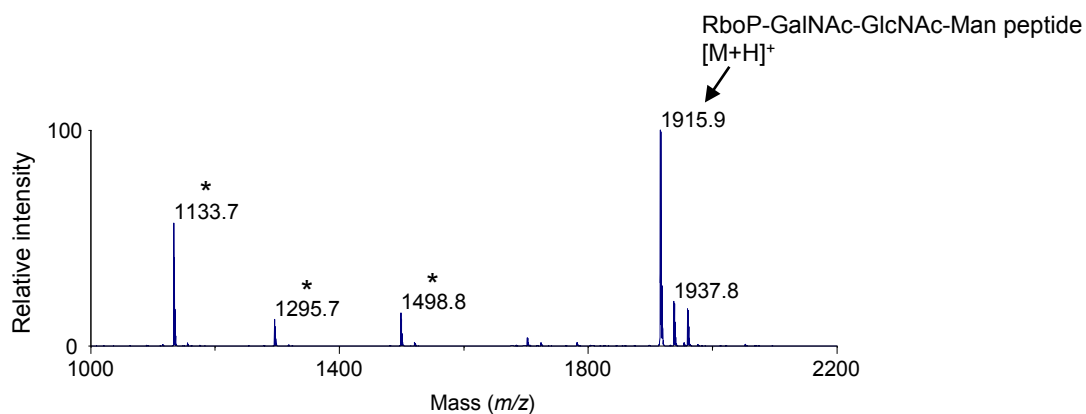

### Supplementary Figure 5.

Confirmation of the preparation of the RboP-core M3 peptide by MALDI-TOF-MS. The peak 1915.9 corresponds to the  $[M + H]^+$  ion of the RboP-core M3 peptide (RboP-GalNAc-GlcNAc-Man peptide). The peak 1937.8 corresponds to the  $[M + Na]^+$  ion of the same peptide. Asterisks represent fragment ions formed during the MS experiment.

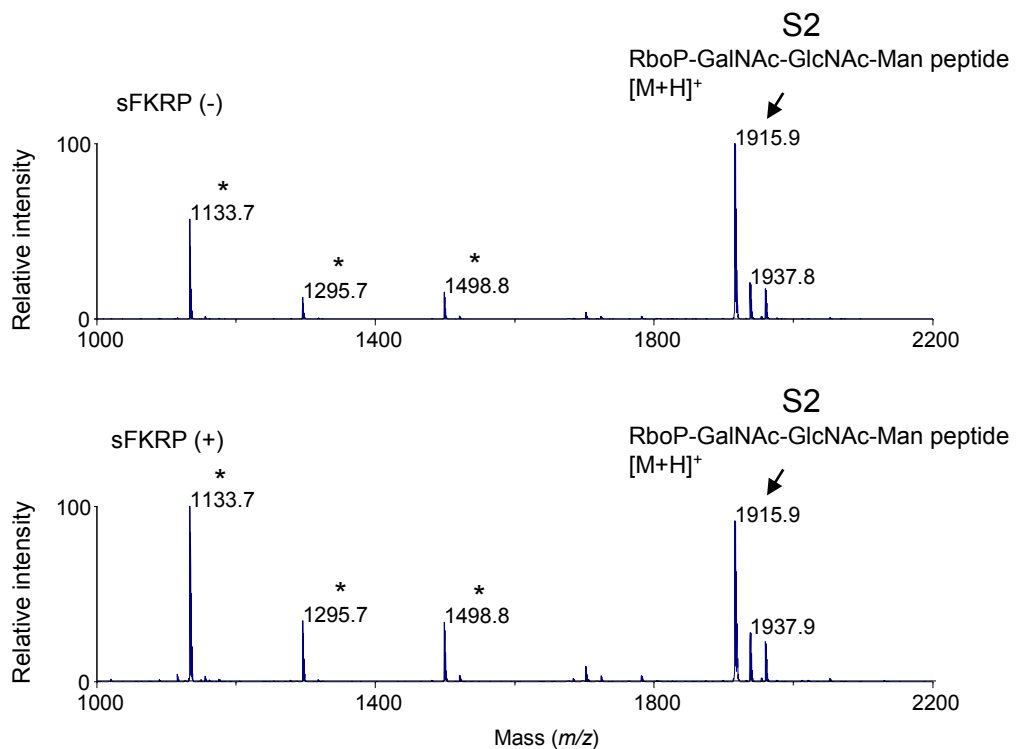

### Supplementary Figure 6.

MALDI-TOF-MS spectra of the eluate around peak S2 in Figure 5B. The peak 1915.9 corresponding to the  $[M + H]^+$  ion of the RboP-core M3 peptide (RboP-GalNAc-GlcNAc-Man peptide) was detected but the peak corresponding to the RboP-transferred RboP-RboP-core M3 peptide (calculated  $m/z$  value, 2129.9) was not detected in the presence of sFKRP (lower). Asterisks represent fragment ions formed during the MS experiment.



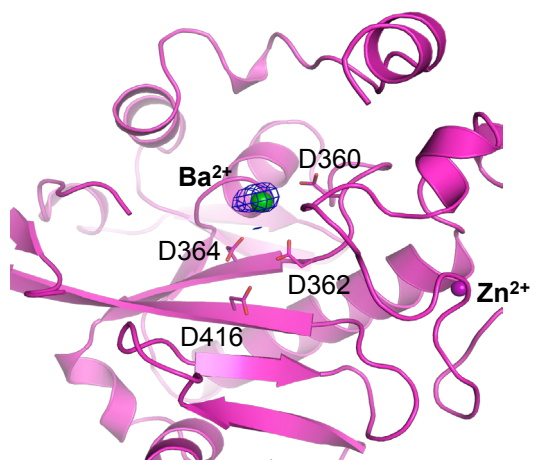

**Supplementary Figure 7.**

The anomalous difference Fourier map around the Barium ion for the Ba-SAD data set (blue mesh). The contour level is  $5.0 \sigma$ . The color configuration is the same as in Figure 3B.

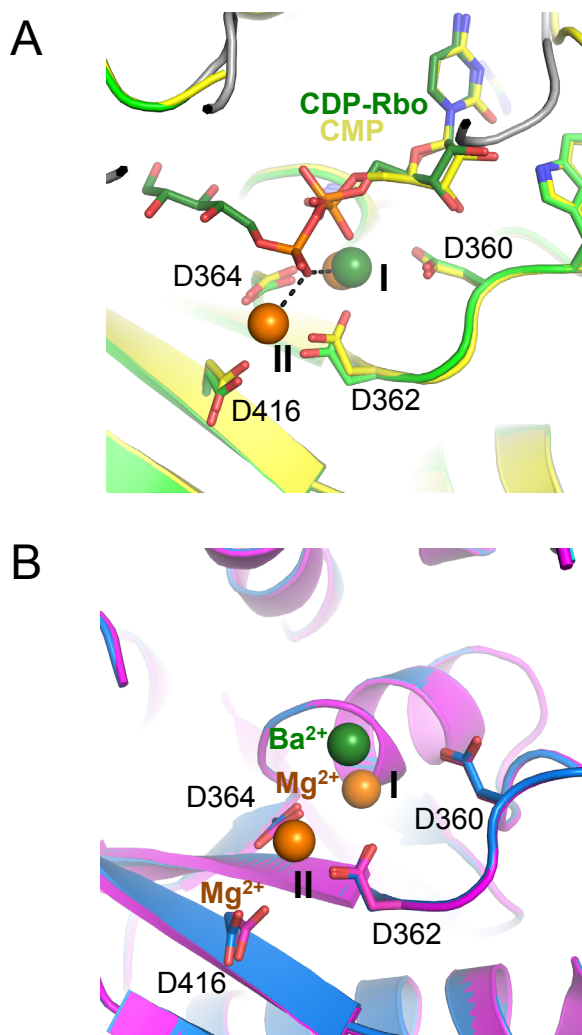

### Supplementary Figure 8.

A) Superimposition of the CDP-Rbo-bound and CMP-bound structures. The color configuration is the same as in Figure 3C and D, except for CMP and CDP-Rbo. Carbon atoms in CDP-Rbo and CMP are colored green and yellow, respectively. Dotted lines indicate proximity between CDP-Rbo (in the  $Ba^{2+}$  and CDP-Rbo-bound structure) and  $Mg^{2+}$  (the  $Mg^{2+}$  and CMP-bound structure). The distances between Ob and  $Mg^{2+}$  (site I), and between Ob and  $Mg^{2+}$  (site II) were 2.9 and 2.8 Å, respectively. B) Comparison of substrate-free forms. The  $Mg^{2+}$ -bound structure (Figure 3A) and  $Ba^{2+}$ -bound structure (Figure 3B) are superimposed. At site I, the long coordination distances observed in the  $Mg^{2+}$ -bound form permit the binding of  $Ba^{2+}$ , which has a larger ionic radius. However, site II has a small coordination sphere and it cannot accommodate a  $Ba^{2+}$ .

**A**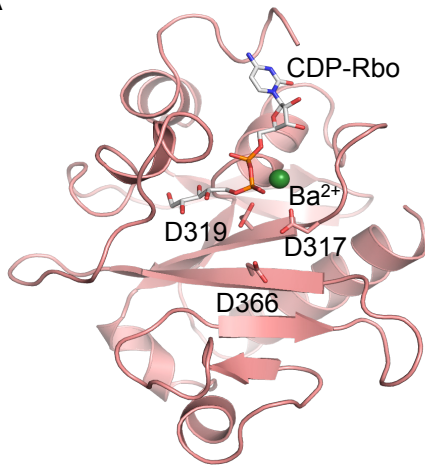**B**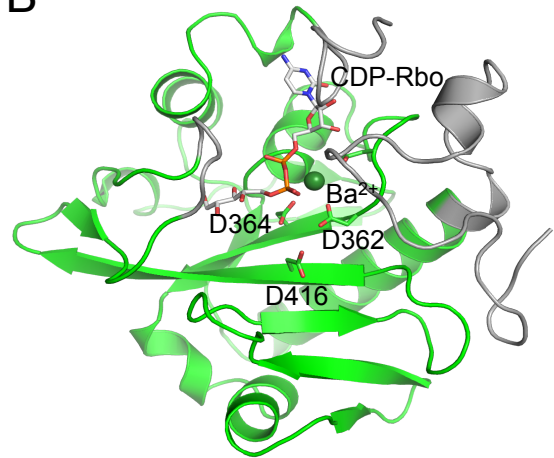**Supplementary Figure 9.**

A) Homology model of the catalytic domain of FKTN (E249–Y461). Three Asp residues (D317, D319, and D366) are shown as stick models. CDP-Rbo and Ba<sup>2+</sup> were placed according to the template structure. This model was prepared by SWISS-MODEL (<https://swissmodel.expasy.org>).

B) Structure of the catalytic domain of FKRP (G288–L491) with CDP-Rbo and Ba<sup>2+</sup> used as a template model. The colors are assigned as in Figure 3C.

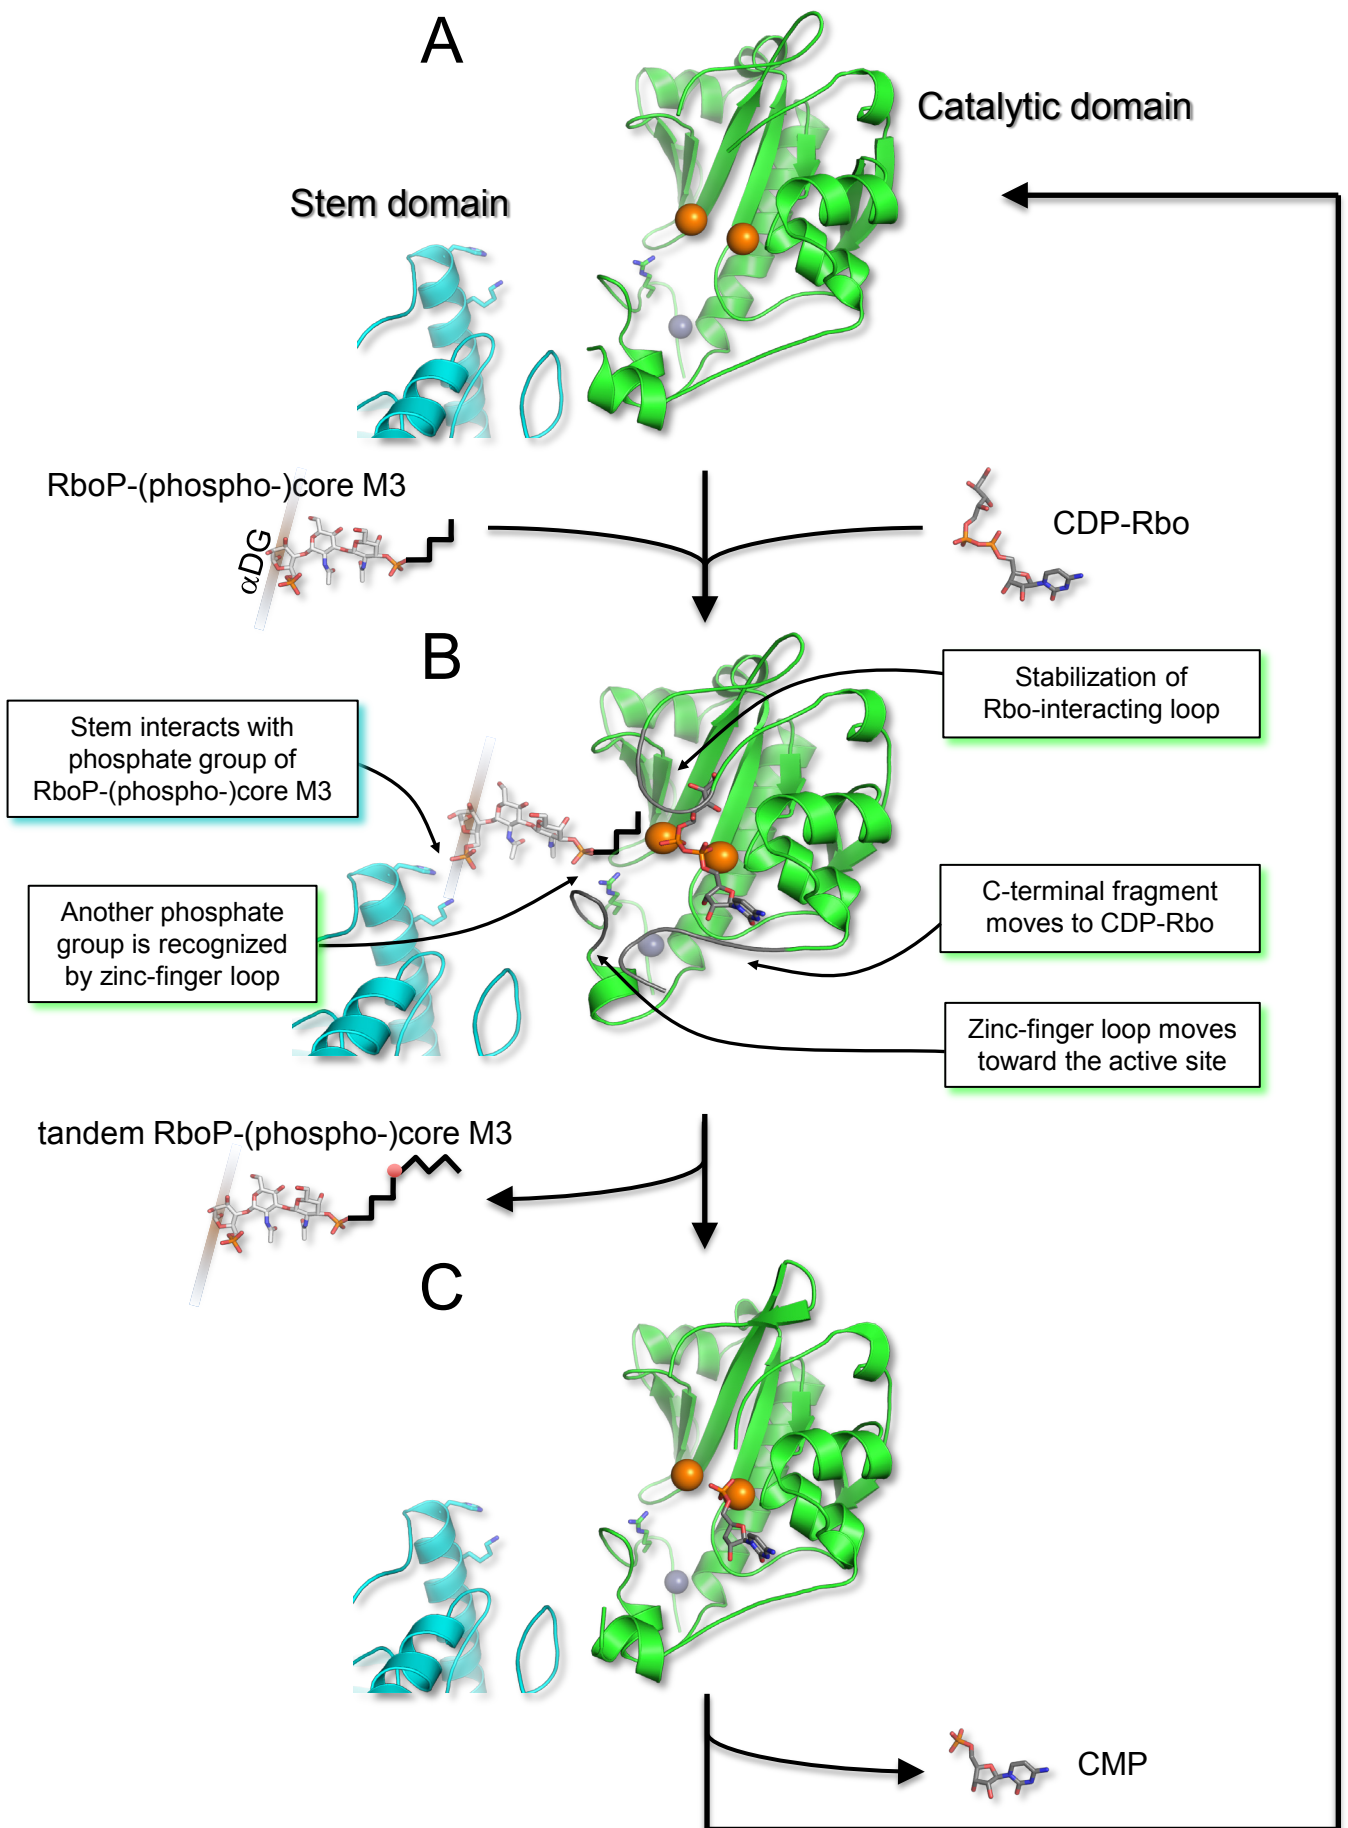

Supplementary Figure 10

### Supplementary Figure 10.

Proposed catalytic mechanism of FKRP revealed in this study. In this figure, the catalytic domain (green) and stem domain from another protomer (light blue) are picked up for clarity.  $Mg^{2+}$  and  $Zn^{2+}$  are shown as orange and gray balls, respectively. A) In the substrate-free state (two  $Mg^{2+}$  are bound in this figure, versus one  $Ba^{2+}$  at site I), the Rbo-interacting loop is disordered and the C-terminal fragment locates far from the CDP-Rbo binding site. B) When CDP-Rbo binds, the Rbo-interacting loop covers the Rbo moiety and the C-terminal fragment moves to interact with the CDP moiety. In accompaniment with these conformational changes, the zinc-finger loop moves toward the active site to form an acceptor-binding site. The acceptor glycopeptide interacts with both the catalytic and stem domains from different protomers. Then, RboP is transferred to RboP-(phospho-)core M3 from CDP-Rbo. The regions where conformational changes are evoked are colored grey. R295 is shown by stick model. C) After releasing the product (tandem RboP-(phospho-)core M3), the conformation of FKRP returns to the substrate-free form to release CMP.

## Supplementary Table 1. X-ray crystallographic data collection and refinement statistics

|                              | Ba <sup>2+</sup> bound form                           | Ba-SAD data                                           | Mg <sup>2+</sup> bound form                           | Mg <sup>2+</sup> and<br>CMP complex                   | Ba <sup>2+</sup> and<br>CDP-ribitol complex           | Ba <sup>2+</sup> , CDP-ribitol<br>and acceptor complex |
|------------------------------|-------------------------------------------------------|-------------------------------------------------------|-------------------------------------------------------|-------------------------------------------------------|-------------------------------------------------------|--------------------------------------------------------|
| <b>data statistics</b>       |                                                       |                                                       |                                                       |                                                       |                                                       |                                                        |
| Wavelength (angstrom)        | 1.0000                                                | 1.9000                                                | 1.0000                                                | 1.0000                                                | 1.0000                                                | 0.9800                                                 |
| Resolution range             | 48.92 - 2.25 (2.33 - 2.25)                            | 48.93 - 2.24 (2.28-2.24)                              | 45.65 - 2.06(2.13 - 2.06)                             | 47.13 - 2.60(2.69 - 2.60)                             | 43.31 - 2.23 (2.31 - 2.23)                            | 42.74 - 2.47 (2.55 - 2.47)                             |
| Space group                  | <i>P</i> 2 <sub>1</sub> 2 <sub>1</sub> 2 <sub>1</sub> | <i>P</i> 2 <sub>1</sub> 2 <sub>1</sub> 2 <sub>1</sub> | <i>P</i> 2 <sub>1</sub> 2 <sub>1</sub> 2 <sub>1</sub> | <i>P</i> 2 <sub>1</sub> 2 <sub>1</sub> 2 <sub>1</sub> | <i>P</i> 2 <sub>1</sub> 2 <sub>1</sub> 2 <sub>1</sub> | <i>P</i> 2 <sub>1</sub> 2 <sub>1</sub> 2 <sub>1</sub>  |
| Unit cell a,b,c              | 77.1, 119.0, 257.6                                    | 77.2, 119.2, 255.8                                    | 76.8, 119.4,258.1                                     | 77.6, 118.7, 252.7                                    | 77.4, 118.8, 253.1                                    | 78.6, 119.2, 254.6                                     |
| Total reflections            | 836111                                                | 3249448                                               | 1025492                                               | 485564                                                | 752011                                                | 574111                                                 |
| Unique reflections           | 112891                                                | 114256                                                | 147623                                                | 72606                                                 | 114810                                                | 86984                                                  |
| Multiplicity                 | 7.4                                                   | 28.4                                                  | 6.9                                                   | 6.7                                                   | 6.5                                                   | 6.6                                                    |
| Completeness                 | 1.00 (0.99)                                           | 1.00 (1.00)                                           | 1.00 (0.97)                                           | 1.00 (1.00)                                           | 1.00 (0.97)                                           | 1.00 (0.99)                                            |
| Mean I/sigma(I)              | 14.47 (1.59)                                          | 22.40 (2.40)                                          | 18.68 (1.75)                                          | 13.56 (1.56)                                          | 14.36 (1.61)                                          | 16.18 (1.62)                                           |
| Wilson B-factor              | 45.39                                                 | 43.36                                                 | 37.00                                                 | 51.64                                                 | 39.56                                                 | 55.28                                                  |
| R-merge                      | 0.099                                                 | 0.140                                                 | 0.066                                                 | 0.119                                                 | 0.098                                                 | 0.087                                                  |
| R-meas                       | 0.107                                                 | 0.143                                                 | 0.071                                                 | 0.130                                                 | 0.106                                                 | 0.094                                                  |
| CC1/2                        | 0.999 (0.708)                                         | 0.999 (0.838)                                         | 0.999 (0.633)                                         | 0.998 (0.718)                                         | 0.999 (0.699)                                         | 0.999 (0.765)                                          |
| <b>refinement statistics</b> |                                                       |                                                       |                                                       |                                                       |                                                       |                                                        |
| PDB ID                       | 6KAN                                                  | 6L7U                                                  | 6KAK                                                  | 6KAL                                                  | 6KAJ                                                  | 6KAM                                                   |
| R-work                       | 0.196                                                 | 0.200                                                 | 0.196                                                 | 0.195                                                 | 0.209                                                 | 0.208                                                  |
| R-free                       | 0.232                                                 | 0.234                                                 | 0.227                                                 | 0.241                                                 | 0.244                                                 | 0.249                                                  |
| Number of non-hydrogen atoms | 14132                                                 | 14108                                                 | 14589                                                 | 14174                                                 | 14571                                                 | 14279                                                  |
| macromolecules               | 13541                                                 | 13531                                                 | 13523                                                 | 13805                                                 | 13780                                                 | 13796                                                  |
| ligands                      | 107                                                   | 78                                                    | 123                                                   | 110                                                   | 256                                                   | 290                                                    |
| solvent                      | 484                                                   | 499                                                   | 943                                                   | 259                                                   | 535                                                   | 193                                                    |
| Protein residues             | 1762                                                  | 1758                                                  | 1767                                                  | 1772                                                  | 1779                                                  | 1779                                                   |
| RMS(bonds)                   | 0.010                                                 | 0.005                                                 | 0.006                                                 | 0.010                                                 | 0.005                                                 | 0.007                                                  |
| RMS(angles)                  | 1.05                                                  | 0.767                                                 | 0.724                                                 | 1.002                                                 | 0.868                                                 | 0.949                                                  |
| Ramachandran favored (%)     | 97.6                                                  | 97.1                                                  | 97.8                                                  | 96.8                                                  | 96.9                                                  | 96.8                                                   |
| Ramachandran allowed (%)     | 2.3                                                   | 2.7                                                   | 2.1                                                   | 3.0                                                   | 3.0                                                   | 3.1                                                    |
| Ramachandran outliers (%)    | 0.1                                                   | 0.2                                                   | 0.1                                                   | 0.2                                                   | 0.1                                                   | 0.2                                                    |
| Rotamer outliers (%)         | 0.2                                                   | 0.1                                                   | 0.0                                                   | 0.1                                                   | 0.0                                                   | 0.0                                                    |
| Average B-factor             | 57.47                                                 | 59.56                                                 | 46.61                                                 | 65.16                                                 | 56.71                                                 | 75.35                                                  |
| macromolecules               | 57.52                                                 | 59.67                                                 | 46.44                                                 | 65.27                                                 | 56.82                                                 | 75.09                                                  |
| ligands                      | 82.05                                                 | 84.35                                                 | 65.02                                                 | 80.53                                                 | 68.38                                                 | 97.92                                                  |
| solvent                      | 50.39                                                 | 52.70                                                 | 46.69                                                 | 52.99                                                 | 49.38                                                 | 60.36                                                  |

Statistics for the highest-resolution shell are shown in parentheses.

## Supplementary Table 1. X-ray crystallographic data collection and refinement statistics (continued)

|                                     | Mg <sup>2+</sup> bound form<br>Zinc peak data*  | Mg <sup>2+</sup> bound form<br>Zinc remote low data* |
|-------------------------------------|-------------------------------------------------|------------------------------------------------------|
| <b>data statistics</b>              |                                                 |                                                      |
| <b>Wavelength (angstrom)</b>        | 1.2825                                          | 1.2898                                               |
| <b>Resolution range</b>             | 47.30 - 2.41 (2.49 - 2.41)                      | 49.05 - 2.41 (2.49 - 2.41)                           |
| <b>Space group</b>                  | <i>P2<sub>1</sub>2<sub>1</sub>2<sub>1</sub></i> | <i>P2<sub>1</sub>2<sub>1</sub>2<sub>1</sub></i>      |
| <b>Unit cell</b>                    | 76.9, 119.4, 257.6                              | 77.0, 119.5, 257.8                                   |
| <b>Total reflections</b>            | 610687                                          | 611519                                               |
| <b>Unique reflections</b>           | 177224                                          | 177585                                               |
| <b>Multiplicity</b>                 | 3.4                                             | 3.4                                                  |
| <b>Completeness (%)</b>             | 1.00 (0.98)                                     | 1.00 (0.98)                                          |
| <b>Mean I/sigma(I)</b>              | 12.97 (2.18)                                    | 12.15 (1.74)                                         |
| <b>Wilson B-factor</b>              | 38.25                                           | 40.49                                                |
| <b>R-merge</b>                      | 0.074                                           | 0.081                                                |
| <b>R-meas</b>                       | 0.088                                           | 0.096                                                |
| <b>CC1/2</b>                        | 0.998 (0.788)                                   | 0.998 (0.694)                                        |
| <b>refinement statistics</b>        |                                                 |                                                      |
| <b>PDB ID</b>                       | 6L7S                                            | 6L7T                                                 |
| <b>R-work</b>                       | 0.182                                           | 0.177                                                |
| <b>R-free</b>                       | 0.211                                           | 0.210                                                |
| <b>Number of non-hydrogen atoms</b> | 14524                                           | 14642                                                |
| <b>macromolecules</b>               | 13562                                           | 13562                                                |
| <b>ligands</b>                      | 108                                             | 108                                                  |
| <b>solvent</b>                      | 854                                             | 972                                                  |
| <b>Protein residues</b>             | 1759                                            | 1759                                                 |
| <b>RMS(bonds)</b>                   | 0.007                                           | 0.006                                                |
| <b>RMS(angles)</b>                  | 0.782                                           | 0.832                                                |
| <b>Ramachandran favored (%)</b>     | 97.4                                            | 97.7                                                 |
| <b>Ramachandran allowed (%)</b>     | 2.6                                             | 2.2                                                  |
| <b>Ramachandran outliers (%)</b>    | 0.1                                             | 0.1                                                  |
| <b>Rotamer outliers (%)</b>         | 0.0                                             | 0.2                                                  |
| <b>Average B-factor</b>             | 49.5                                            | 49.95                                                |
| <b>macromolecules</b>               | 49.48                                           | 49.81                                                |
| <b>ligands</b>                      | 66.54                                           | 65.87                                                |
| <b>solvent</b>                      | 47.41                                           | 50.11                                                |

Statistics for the highest-resolution shell are shown in parentheses.

\* Friedel mates were counted separately.

Supplementary Table 2. Buried Surface Area ( $\text{\AA}^2$ )

| chain      | A          | B          | C         | D         | A+B        | C+D        |
|------------|------------|------------|-----------|-----------|------------|------------|
| <b>A</b>   | -          | 1496 (931) | 774 (0)   | 85(9)     | -          | 859 (9)    |
| <b>B</b>   | 1496 (931) | -          | 91(24)    | 697 (697) | -          | 788(721)   |
| <b>C</b>   | 774 (0)    | 91(24)     | -         | 1463(926) | 865 (24)   | -          |
| <b>D</b>   | 85(9)      | 697 (697)  | 1463(926) | -         | 782 (706)  | -          |
| <b>A+B</b> | -          | -          | 865 (24)  | 782 (706) | -          | 1647 (730) |
| <b>C+D</b> | 859 (9)    | 788(721)   | -         | -         | 1647 (730) | -          |



Supplementary Table 3. Summary of metal ion interaction in each state

|                              |            | Ligand bound state     |            |                          |
|------------------------------|------------|------------------------|------------|--------------------------|
|                              |            | Mg <sup>2+</sup> bound |            | Mg <sup>2+</sup> and CMP |
| Mg <sup>2+</sup> (site I) *1 | Asp360(Oδ) | 3.61                   | Asp360(Oδ) | 3.37                     |
|                              | Asp362(Oδ) | 3.40                   | Asp362(Oδ) | 2.16                     |
|                              | Asp364(Oδ) | 3.00                   | Asp364(Oδ) | 2.06                     |
|                              |            |                        | CMP (O1α)  | 2.61                     |
| Mg <sup>2+</sup> (site II)   | Asp362(Oδ) | 2.22                   | Asp362(Oδ) | 2.15                     |
|                              |            |                        | Asp364(Oδ) | 2.80                     |
|                              |            |                        | Asp416(Oδ) | 2.25                     |

|                               |            | Ligand bound state     |             |                              |
|-------------------------------|------------|------------------------|-------------|------------------------------|
|                               |            | Ba <sup>2+</sup> bound |             | Ba <sup>2+</sup> and CDP-Rbo |
| Ba <sup>2+</sup> (site I)     | Asp360(Oδ) | 4.38                   | Asp360(Oδ)  | 3.05                         |
|                               | Asp362(Oδ) | 3.92                   | Asp362(Oδ)  | 2.78                         |
|                               | Asp364(Oδ) | 3.90                   | Asp364(Oδ)  | 2.90                         |
|                               |            |                        | CDP-Rbo(Oα) | 2.72                         |
|                               |            |                        | CDP-Rbo(Oβ) | 2.96                         |
| Ba <sup>2+</sup> (site II) *2 | Asp362(Oδ) | 2.98                   |             |                              |
|                               | Asp364(Oδ) | 3.18                   |             | Not found                    |
|                               | Asp416(Oδ) | 4.34                   |             |                              |

\*1) Mg<sup>2+</sup> (site I) in Mg<sup>2+</sup> bound state is only found in chain A and B.

\*2) Ba<sup>2+</sup> (site II) in Ba<sup>2+</sup> bound state is only found in chain B.

Supplementary Table 4. Sequences of used primers

| Oligonucleotide     | Sequence 5'-3'                                        |
|---------------------|-------------------------------------------------------|
| FKRP_pPA_A45_F      | GTACTTCCAGGGAGGCCGGCCTGCCGGCCCCCGTGTACACCGTCC         |
| FKRP_pPA_Ct(G495)_R | CTTAAGCGCTAGAGGCCGGCCTCAGCCGCTTCCCGTCAGACTCAG         |
| Y88F-F              | GTGGCAGCCGACACGCTCCCCttcCCGCCCTGGCCCTGCCCCGC          |
| Y88F-R              | GCGGGGCAGGGCCAGGGGCGGgaaGGGGAGCGTGTGCGGCTGCCAC        |
| S221R-F             | CGCGCCCGCGACCTCTTCAACCTCagaGCGCCCCTGGCCCCGGCCGG       |
| S221R-R             | CCGGCCGGGCCAGGGGCGCtctGAGGTTGAAGAGGTCGCGGGGCGCG       |
| L276I-F             | CTGCTCCGCGCGCTGGGCATCCGCattGTGAGCTGGGAAGGCGGGCGGCTG   |
| L276I-R             | CAGCCGCCCGCCTTCCAGCTCACaatGCGGATGCCAGCGCGCGGAGCAG     |
| D360A-F             | GGACATCATCCCATGGgccTACGACGTGGACCTGG                   |
| D360A-R             | CCAGGTCCACGTCGTAaggcCCATGGGATGATGTCC                  |
| D362A-F             | CGGGGACATCATCCCATGGGACTACgccGTGGACCTGGGCATCTACTTGGAGG |
| D362A-R             | CCTCCAAGTAGATGCCAGGTCCACggcGTAGTCCCATGGGATGATGTCCCCG  |
| D364A-F             | CATCATCCCATGGGACTACGACGTGgccCTGGGCATCTACTTGGAGGACGTGG |
| D364A-R             | CCACGTCTCCAAGTAGATGCCAGggcCACGTCGTAGTCCCATGGGATGATG   |
| D416A-F             | CAGCGAAAGCAACCACTTGCACGTGgccCTGTGGCCCTTCTACCCCCGCAATG |
| D416A-R             | CATTGCGGGGGTAGAAGGGCCACAGggcCACGTGCAAGTGGTTGCTTTGCTG  |
| H252A-F             | GCCCCCGCTGGCCACGGCCgcgGCGCGCTGGAAGGCTGAGCG            |
| H252A-R             | CGCTCAGCCTTCCAGCGCGCcgCGGCCGTGGCCAGCGGGGGC            |
| K256A-F             | CCACGGCCACGCGCGCTGGgcgGCTGAGCGCGAGGGACGCGC            |
| K256A-R             | GCGCGTCCCTCGCGCTCAGCcgCGCCAGCGCGCGTGGGCCGTGG          |
| R295A-F             | GCTGCAACAAGGAGACCACGgcgTGCTTCGGAACCGTGGTGGG           |
| R295A-R             | CCCACCACGGTTCGAAGCAcgcCGTGGTCTCCTTGTTCAGC             |

Mutational codons were indicated as lower cases.

## Supplementary References

1. Katoh K, Rozewicki J, Yamada KD (2017) MAFFT online service: multiple sequence alignment, interactive sequence choice and visualization. *Briefings in Bioinformatics*, 1. 7. [doi: 10.1093/bib/bbx108]
2. Robert X, Gouet P (2014) Deciphering key features in protein structures with the new ENDscript server. *Nucleic Acids Res* 42:W320.W324. [doi: 10.1093/nar/gku316]
